# Supplementary material for: Gene expression variation to predict 10-year survival in lymph-node-negative breast cancer
Source: BMC Cancer. 2008 Sep 8;8:254. doi: 10.1186/1471-2407-8-254 (PMC2559847; doi:10.1186/1471-2407-8-254)
Supplement: Additional file 1 — Clinical data of each patient. Information about date of diagnosis, age at diagnosis, tumour size, hormone receptor status, S phase, ploidy, histology, surgery, post-surgical treatment, and survival data of each individual patient used in the study. HER2 testing was not available at the time. [file 1471-2407-8-254-S1.xls]

## Sheet: Blad1
tumour accession number	date of diagnosis	ten year survivor	age at diagnosis (years)	tumour size (mm)	lymph-node metastsis	estrogen receptor	progesterone receptor	S phase (%)	DNA index	Ploidy	Histology	surgery	radio therapy	chemo therapy	hormonal treatment	dead	date of death	survival time (years)
4194	1990-01-29	yes	54	40	0	neg	neg	-	-	-	-	mastectomy	-	1	1	no	-	-
4296	1990-02-16	no	50	40	0	neg	neg	-	-	-	duct	mastectomy	0	1	1	yes	1992-07-25	2.436687
4302	1990-02-21	no	43	65	0	pos	pos	-	-	-	duct	mastectomy	0	-	0	yes	1992-09-08	2.546201
5550	1991-05-29	yes	37	35	0	neg	neg	19.8	1.7	aneuploid	duct	mastectomy	0	0	0	no	-	-
6039	1992-01-09	no	57	19	0	neg	neg	12.0	1.8	aneuploid	duct	breast preserving	0	0	1	yes	1995-07-15	3.512663
6061	1992-01-10	yes	39	40	0	pos	pos	5.7	1.1	aneuploid	duct	mastectomy	0	0	0	no	-	-
6130	1992-01-23	yes	41	56	0	neg	pos	9.6	1.9	aneuploid	duct	mastectomy	0	0	0	no	-	-
6195	1992-02-07	no	58	12	0	neg	neg	-	-	-	-	mastectomy	0	0	0	yes	2001-05-11	9.256674
6316	1992-03-26	no	57	20	0	pos	pos	28.1	2.0	aneuploid	-	breast preserving	0	-	-	yes	2001-09-20	9.486653
6381	1992-05-05	no	70	16	0	pos	pos	-	-	-	-	mastectomy	0	0	0	yes	1997-07-17	5.199179
6640	1992-08-25	no	71	18	0	pos	neg	7.4	1.1	aneuploid	duct	mastectomy	0	-	1	yes	1998-11-09	6.206708
6839	1992-12-10	no	43	17	0	neg	neg	26.0	1.6	aneuploid	duct	breast preserving	1	0	1	yes	1996-04-27	3.378508
6865	1992-12-16	no	63	19	0	pos	neg	9.1	1.0	diploid	duct	mastectomy	0	0	0	yes	1995-06-30	2.53525
6866	1992-12-15	yes	48	55	0	pos	neg	10.0	2.0	aneuploid	mucinous	breast preserving	1	1	0	no	-	-
6880	1992-12-08	yes	69	17	0	-	-	-	2.7	aneuploid	duct	mastectomy	0	0	0	no	-	-
6915	1993-01-05	no	64	20	0	pos	neg	14.1	1.5	aneuploid	tubular	mastectomy	0	0	0	yes	1997-09-19	4.703628
7011	1993-03-03	yes	39	29	0	pos	pos	3.0	1.0	diploid	duct	mastectomy	0	1	0	no	-	-
7173	1993-04-20	yes	48	42	0	pos	neg	3.5	1.0	diploid	mucinous	mastectomy	0	0	1	yes	2003-10-29	10.5243
7198	1993-05-17	yes	39	29	0	pos	pos	8	1.8	aneuploid	duct	mastectomy	0	0	0	no	-	-
7313	1993-08-02	no	59	16	0	neg	neg	-	1.7 1.8	multiploid	duct	breast preserving	0	0	0	yes	2000-02-18	6.546201
7418	1993-09-10	yes	50	30	0	neg	neg	-	1.8	aneuploid	duct	breast preserving	0	-	-	no	-	-
7453	1993-09-08	no	51	21	0	pos	neg	5.9	1.0	diploid	duct	breast preserving	0	0	0	yes	2002-08-15	8.93424
7512	1993-10-20	yes	51	21	0	pos	pos	6.2	1.8	aneuploid	duct	breast preserving	1	0	1	yes	2004-08-23	10.84189
7547	1993-10-28	yes	50	26	0	neg	neg	3.5	1.0	diploid	duct	breast preserving	1	1	0	no	-	-
7613	1993-12-07	yes	59	30	0	neg	neg	16.9	1.3	aneuploid	duct	breast preserving	0	1	0	no	-	-
7631	1993-11-01	yes	52	21	0	neg	neg	-	1.5 2.7	multiploid	duct	mastectomy	-	1	-	no	-	-
7641	1993-12-13	yes	45	22	0	pos	pos	-	2.0 2.3	multiploid	duct	mastectomy	0	0	0	no	-	-
7647	1993-12-07	yes	58	42	0	pos	neg	1.7	1.0	diploid	duct	mastectomy	0	1	1	no	-	-
7670	1993-12-21	no	47	19	0	pos	pos	32.3	1.7	aneuploid	duct	breast preserving	1	1	1	yes	1997-09-07	3.712526
7680	1993-12-23	yes	39	32	0	neg	pos	25.6	1.6	aneuploid	duct	breast preserving	1	0	1	no	-	-
7700	1994-01-05	yes	53	21	0	neg	neg	10.5	1.0	diploid	duct	breast preserving	1	1	0	no	-	-
7807	1994-02-15	no	54	17	0	pos	neg	-	1.1 1.9 2.7	multiploid	duct	mastectomy	0	0	0	yes	1998-01-03	3.882272
7960	1994-03-22	no	48	17	0	neg	neg	20.0	1.4	aneuploid	duct	breast preserving	0	1	0	yes	1995-06-06	1.207392
8007	1994-06-01	yes	51	30	0	pos	pos	9.8	1.8	aneuploid	duct	breast preserving	1	0	1	no	-	-
8009	1994-05-16	yes	46	20	0	pos	pos	4.1	1.0	diploid	duct	breast preserving	1	0	0	no	-	-
8018	1994-05-19	no	38	20	0	neg	neg	-	1.6	aneuploid	medullary	breast preserving	1	1	0	yes	1996-12-06	2.551677
8138	1994-05-18	no	33	40	0	neg	neg	16.9	1.8	aneuploid	duct	mastectomy	0	0	0	yes	1995-10-08	1.390828
8388	1994-10-17	yes	44	20	0	neg	neg	7.8	1.6	aneuploid	duct	breast preserving	1	1	0	no	-	-
8402	1994-10-26	no	47	15	0	neg	neg	6.1	0.9	aneuploid	duct	breast preserving	0	-	-	yes	1998-06-21	3.67671
8467	1994-10-28	yes	55	30	0	pos	pos	1.2	1.0	diploid	lob	breast preserving	1	0	0	no	-	-
8576	1994-12-21	yes	42	65	0	pos	pos	-	2.0	aneuploid	duct	mastectomy	0	1	1	no	-	-
8903	1995-04-25	no	38	18	0	neg	neg	16.6	1.9	aneuploid	comedo	breast preserving	1	0	0	yes	1996-03-28	0.92539
9138	1995-09-18	no	70	20	0	neg	neg	-	-	-	duct	mastectomy	0	0	0	yes	1999-06-18	3.748118
9253	1995-11-13	no	44	18	0	pos	pos	4.5	1.0	diploid	lob	mastectomy	0	0	0	yes	2000-01-01	4.134155
10068	1996-12-06	no	54	20	0	pos	neg	5.0	0.8	aneuploid	lob	mastectomy	0	0	0	yes	2001-03-21	4.287474
11045	1998-01-15	no	49	20	0	neg	neg	3.2	-	aneuploid	adenocarcinoma	breast preserving	1	0	0	yes	2000-05-05	2.302532
